# Supplementary material for: Pembrolizumab versus chemotherapy in recurrent, advanced urothelial cancer in Japanese patients: a subgroup analysis of the phase 3 KEYNOTE-045 trial
Source: PubMed Central journal article supplement (PMC6946746; doi:10.1007/s10147-019-01545-4), 2019-11-15

## Online Resource

**Article name:** Pembrolizumab versus chemotherapy in recurrent, advanced urothelial cancer in Japanese patients: a subgroup analysis of the phase 3 KEYNOTE-045 trial

**Journal name:** *International Journal of Clinical Oncology*

**Author names:** Hiroyuki Nishiyama,<sup>1</sup> Yoshiaki Yamamoto,<sup>2</sup> Naoto Sassa,<sup>3</sup> Kazuo Nishimura,<sup>4</sup> Kiyohide Fujimoto,<sup>5</sup> Satoshi Fukasawa,<sup>6</sup> Minato Yokoyama,<sup>7</sup> Hideki Enokida,<sup>8</sup> Kenichi Takahashi,<sup>9</sup> Yoshinobu Tanaka,<sup>9</sup> Kentaro Imai,<sup>10</sup> Takashi Shimamoto,<sup>9</sup> Rodolfo Perini,<sup>10</sup> Tara Frenkl,<sup>10</sup> Dean Bajorin,<sup>11</sup> Joaquim Bellmunt<sup>12,13</sup>

**Author affiliations:**

<sup>1</sup>Yubinbango305-8576 Tsukuba, Ibaraki Prefecture Amakubo 2-chome address 1 1, University of Tsukuba Hospital, Tsukuba, Japan

<sup>2</sup>1 Chome-1-1 Minamikogush, Yamaguchi University Hospital, Ube, Japan

<sup>3</sup>65 Tsurumaicho, Showa Ward, Nagoya University Hospital, Nagoya, Japan

<sup>4</sup>3 Chome-1- 6 9 Otemae, Chuo Ward; Osaka International Cancer Institute, Osaka, Japan

<sup>5</sup>840 Shijocho, Nara Medical University Hospital, Kashihara, Japan

<sup>6</sup>666-2 Nitonacho, Chiba Cancer Center, Chiba, Japan

<sup>7</sup>1 Chome-5 4 5 Yushima, Medical Hospital, Tokyo Medical and Dental University, Tokyo, Japan

<sup>8</sup>8-35-1 Sakuragaoka, Kagoshima University Hospital, Kagoshima, Japan

<sup>9</sup>Kitanomaru Square, 1-13-12, Kudan Kita, MSD K.K., Tokyo, Japan

<sup>10</sup>2000 Galloping Hill Rd, Merck & Co., Inc., Kenilworth, NJ, USA

<sup>11</sup>1275 York Avenue, Memorial Sloan Kettering Cancer Center, New York, NY, USA

<sup>12</sup>Carrer del Dr. Aiguader, 88, PSMAR-IMIM Research Institute, Barcelona, Spain

<sup>13</sup>25 Shattuck St, Harvard Medical School, Boston, MA, USA

**Corresponding author:** Hiroyuki Nishiyama

Mailing address: Yubinbango305-8576 Tsukuba, Ibaraki Prefecture Amakubo 2-chome address 1 1, Tsukuba, Japan

Phone: +81 29-853-3900

Fax: +81 35-456-2556

Email: nishiuro@md.tsukuba.ac.jp

**Fig. S1** KEYNOTE-045 Japanese subgroup analysis CONSORT patient disposition flow diagram.

<sup>a</sup>Includes both clinical progression and disease progression. *AE* adverse event, *APaT* all patients as treated, *CR* complete response, *ITT* intent-to-treat, *PD* progressive disease

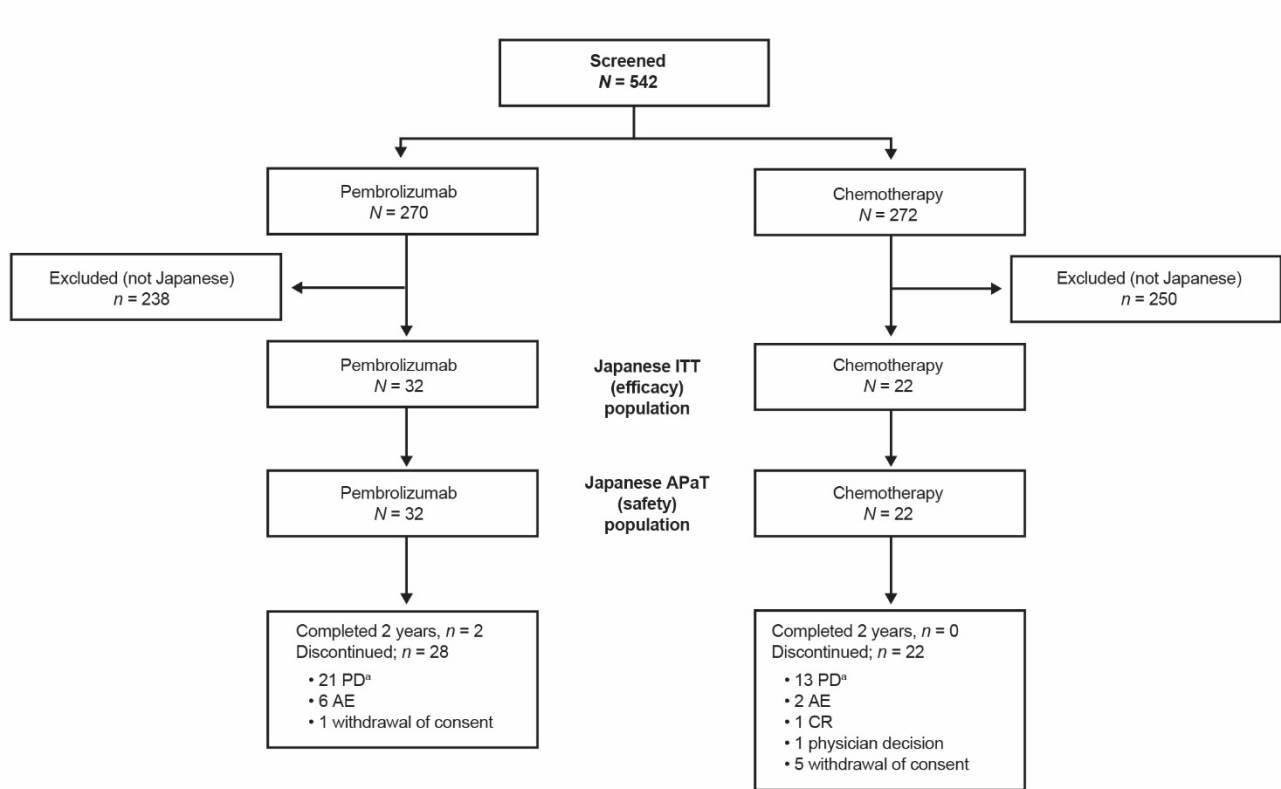

Supplement: 10147_2019_1545_MOESM1_ESM.pdf [file 10147_2019_1545_MOESM1_ESM.pdf]
